# Supplementary material for: Preparation of Nanochitin Films with Oligochitin Graft Chains
Source: MDPI journal article supplement (doi:10.3390/coatings13010047), 2022-12-27
Supplement: s1 [file s1]

Archive with 1 entries (1 files):
- coatings-2085567-supplementary.pdf
