# Supplementary material for: Preparation of Nanochitin Films with Oligochitin Graft Chains
Source: MDPI journal article supplement (doi:10.3390/coatings13010047), 2022-12-27
Supplement: s1 [file s1 › coatings-2085567-supplementary.pdf]

## **Supporting Information**

### **Preparation of Nanochitin Films with Oligochitin Graft Chains**

Kazuya Yamamoto, Yu Obama, and Jun-ichi Kadokawa\*

*Graduate School of Science and Engineering, Kagoshima University, 1-21-40  
Korimoto, Kagoshima 890-0065, Japan*

\* Corresponding author: E-mail: kadokawa@eng.kagoshima-u.ac.jp

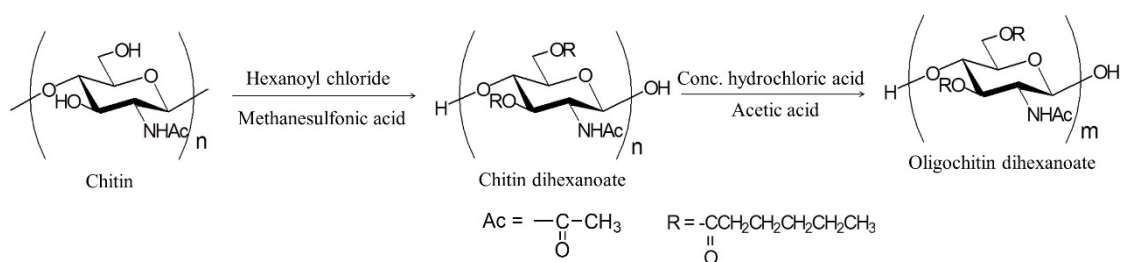

**Figure. S1.** Preparation of oligochitin dihexanoate.

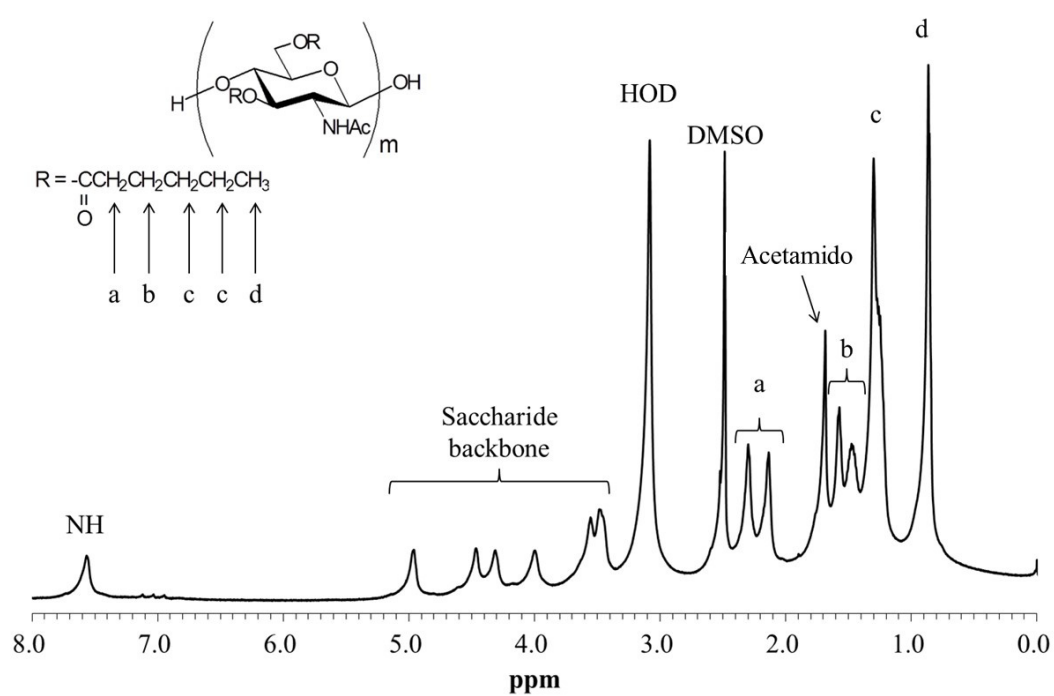

**Figure. S2.**  $^1\text{H}$  NMR spectrum of oligochitin dihexanoate in  $\text{DMSO-}d_6$ .

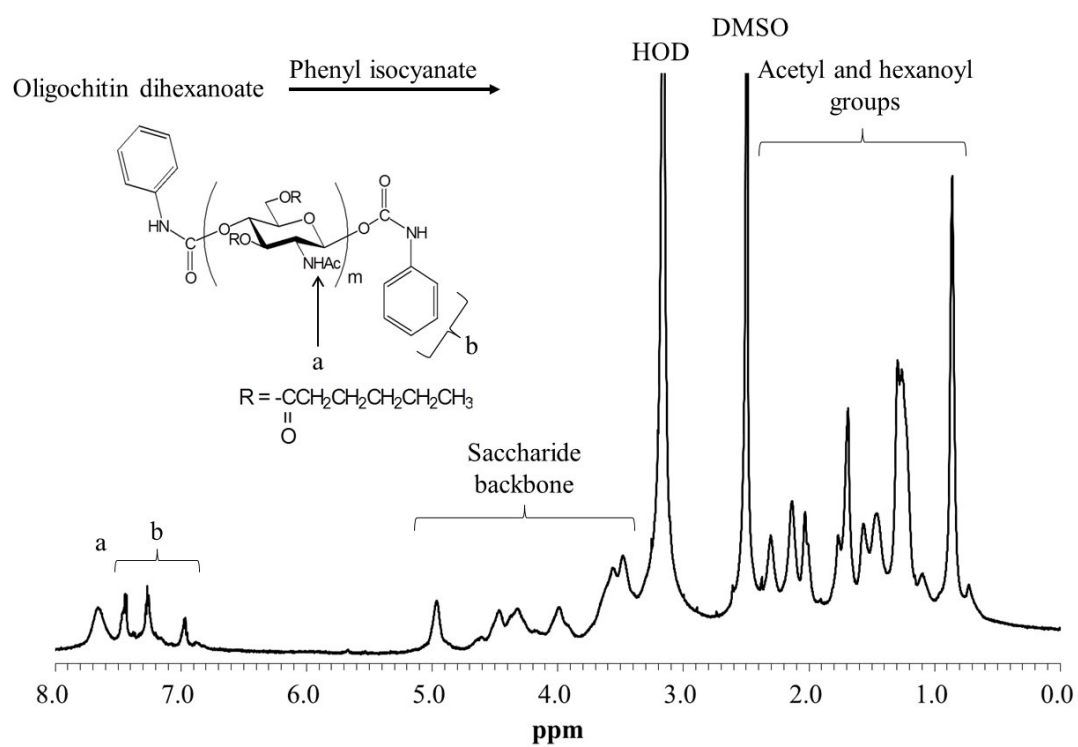

**Figure. S3.**  $^1\text{H}$  NMR spectrum of product by reaction of oligochitin dihexanoate with phenyl isocyanate in  $\text{DMSO}-d_6$ .
